# Supplementary material
Source: PubMed Central journal article supplement (PMC2688989)
Supplement: 0900592106_0900592106SI.pdf [file 0900592106_0900592106SI.pdf]

# Supporting Information

Wang et al. 10.1073/pnas.0900592106

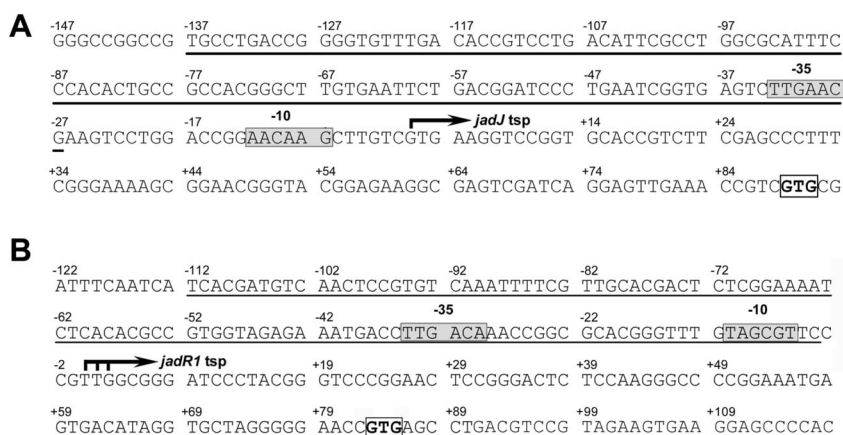

**Fig. S1.** Nucleotide sequences of the promoter regions of *jadJ* (A) and *jadR1* (B). The numbers indicate the distances relative to the respective transcription start points of *jadJ* and *jadR1*. Transcription start points are indicated by bent arrowheads; the JadR1 binding sites are underlined, and the -10 and -35 regions are marked by boxes. The translation start codons in bold type are boxed.

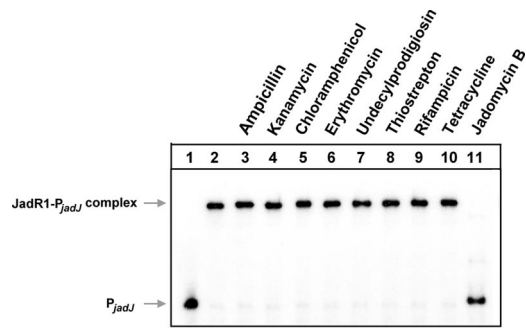

**Fig. S2.** Effect of different antibiotics on the DNA binding activity of JadR1. Each lane contains 10 ng of  $\gamma$ -<sup>32</sup>P-labeled P<sub>jadJ</sub>. Lanes 2–11 contain 50 nM JadR1. Lanes 3–11 contain 800  $\mu$ M antibiotics with distinct structures.
